# Supplementary material for: ENSO statistics, teleconnections, and atmosphere–ocean coupling in the Taiwan Earth System Model version 1
Source: Copernicus journal article supplement (doi:10.5194/gmd-16-4599-2023), 2023-08-11
Supplement: Supplementary file 1 [file gmd-16-4599-2023-supplement.pdf]

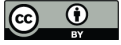

*Supplement of*

## **ENSO statistics, teleconnections, and atmosphere–ocean coupling in the Taiwan Earth System Model version 1**

**Yi-Chi Wang et al.**

*Correspondence to:* Shih-Yu Lee ([shihyu@gate.sinica.edu.tw](mailto:shihyu@gate.sinica.edu.tw)) and Wan-Ling Tseng ([wtseng@ntu.edu.tw](mailto:wtseng@ntu.edu.tw))

The copyright of individual parts of the supplement might differ from the article licence.

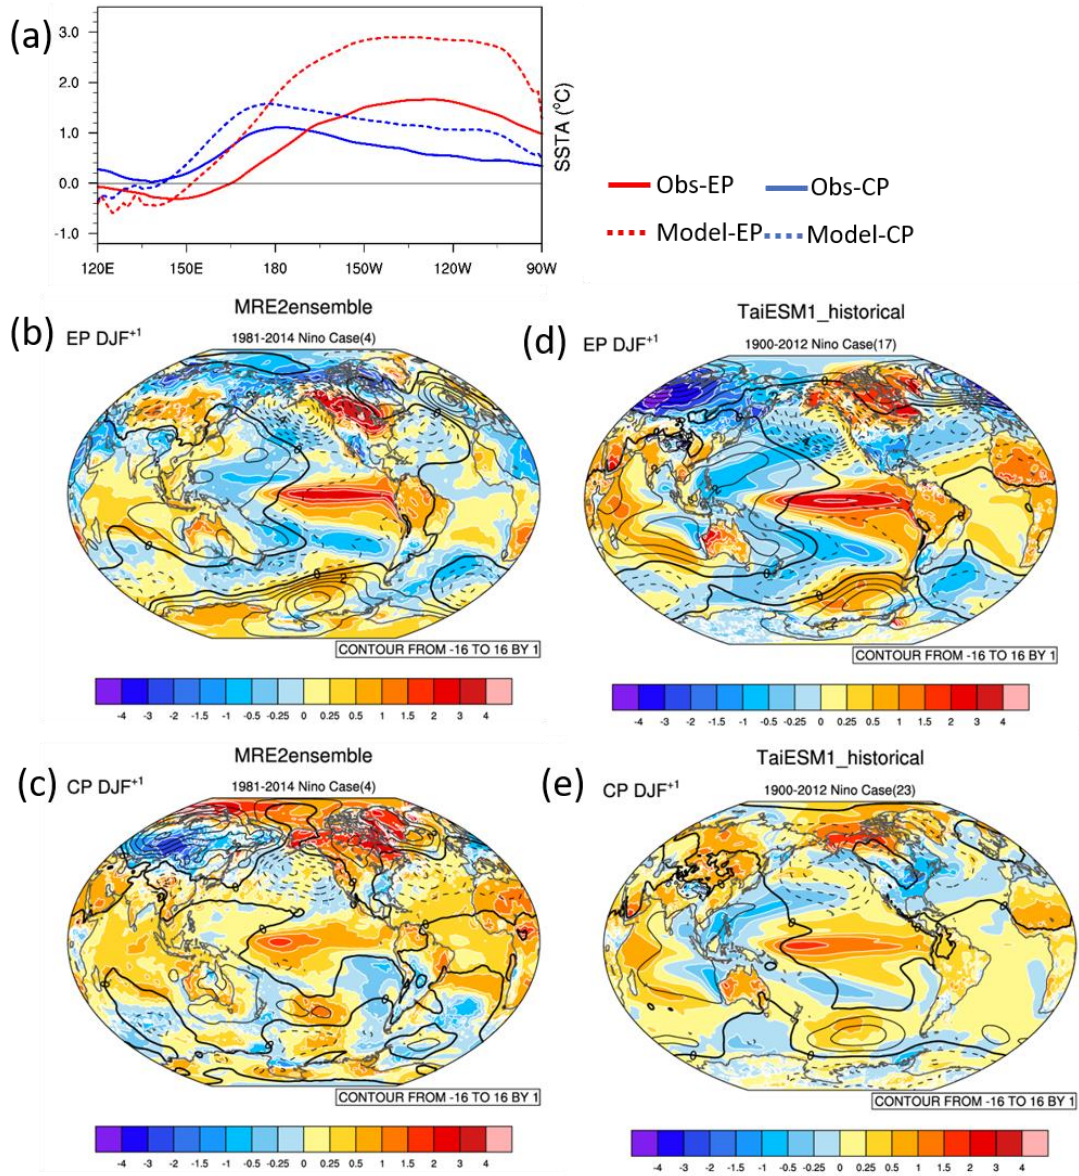

1  
 2 Figure S1: (a) Composites of equatorial SSTA profiles averaged in 5°S-5°N for EP (red  
 3 line) and CP (blue line) events identified in ERSST5 (solid line) and in TaiESM1  
 4 simulations (dashed line). (b-c) Composites of surface temperature and SLP of MRE2  
 5 ensemble based on EP and CP events. (d-e) Composites of surface temperature and SLP  
 6 of TaiESM1 historical runs based on EP and CP events.

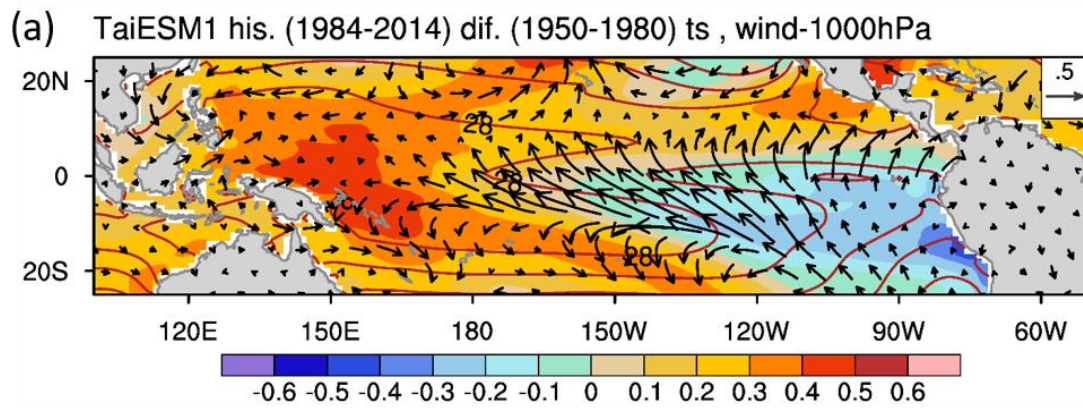

8 Figure S2: Difference of sea surface temperature (color shading) and 1000-hPa winds  
 9 (arrows) during December, January, and February (DJF) between the two periods of weak  
 10 ENSO variability (i.e. 1984-2014) and strong ENSO variability (1950-1980).

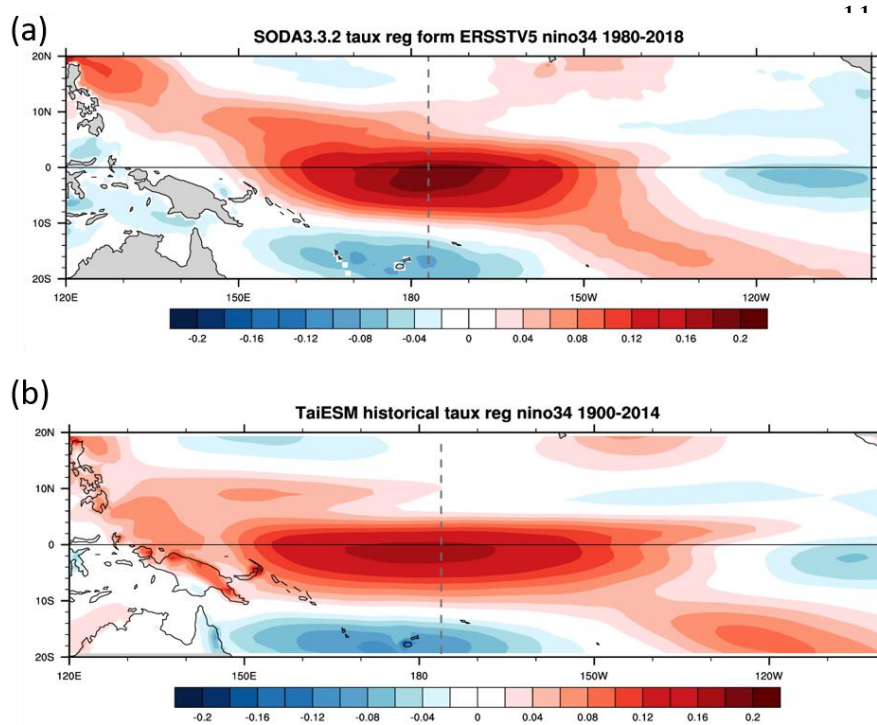

12

13 Fig. S3: Regression of wind stress onto the normalized Niño 3.4 index in (a) SODA v3.2.2  
 14 and ERSSTv5 (1980-2018) and (b) TaiESM1 historical run (1900-2014). The dashed line  
 15 shows the “center of mass” of the positive zonal wind stress anomalies computed as the  
 16 equatorial (2°S to 2°N) zonal wind stress anomaly weighted longitude between 140°E  
 17 and 120°W.

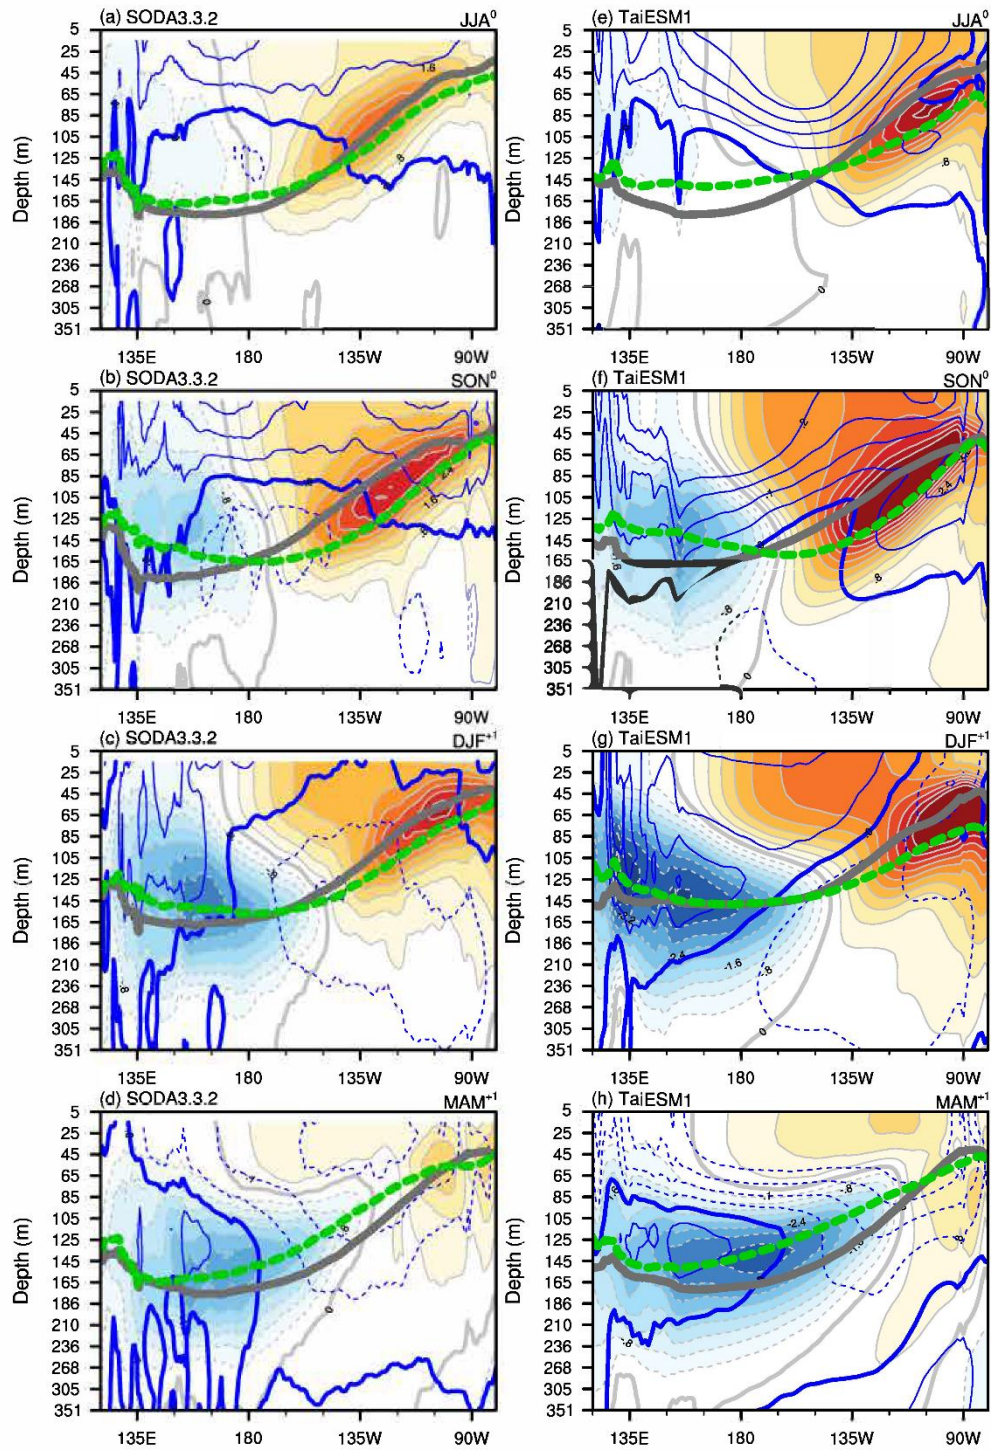

18

19 Figure S4: Equatorial cross-section ( $5^{\circ}\text{S}$ – $5^{\circ}\text{N}$ ) of the El Niño composite of the zonal  
 20 current (blue contour) and potential temperature anomaly (color shading) in (a, e)  $\text{JJA}^0$ ,  
 21 (b, f)  $\text{SON}^0$ , (c, g)  $\text{DJF}^{+1}$ , and (d, h)  $\text{MAM}^{+1}$  based on SODA3.3.2 (left column) and  
 22 TaiESM1 historical run (right column). The gray line shows the climatological  $20^{\circ}\text{C}$   
 23 isotherm (Z20), and the green dashed line shows the Z20 at the Niño state.

24

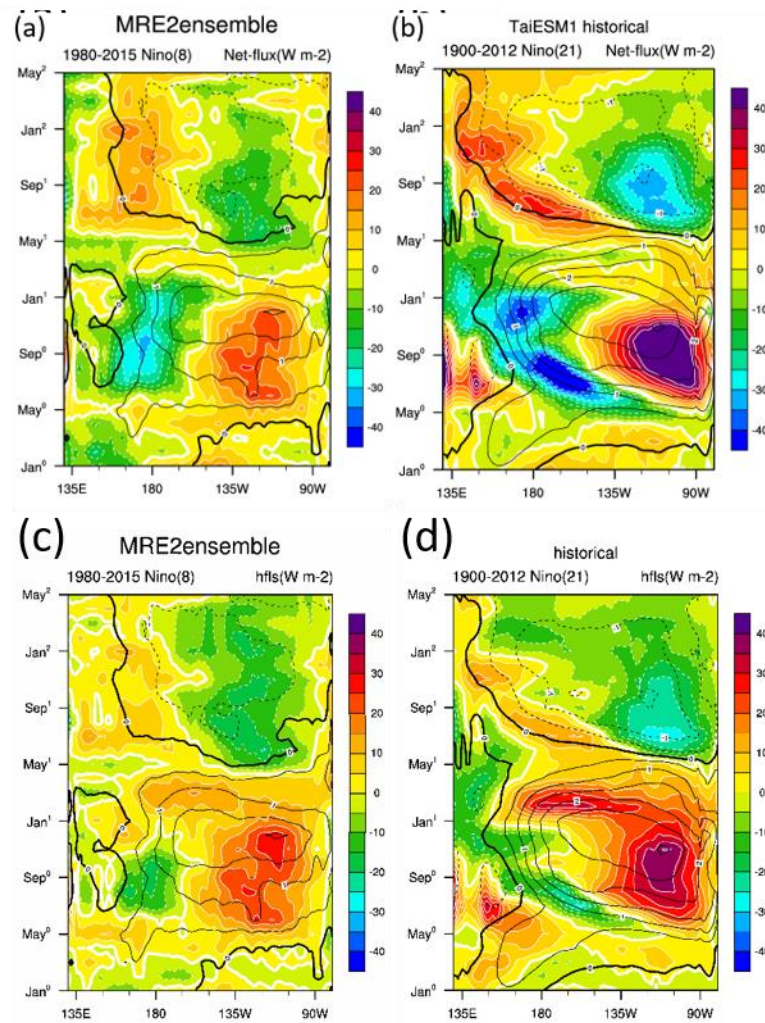

25

26 **Figure S5: Similar to Fig9c, (a,b) but for net radiation flux (color shading; net =**  
 27 **rsus-rsds+rlus-rlds-hfss-hlfs, W m-2), and (c,d) but for surface latent heat flux (color**  
 28 **shading; W m-2). Rsus represents shortwave upwelling fluxes, rlus as longwave**  
 29 **upwelling surface fluxes, rlds as longwave downwelling surface fluxes, hfss as**  
 30 **surface sensible heat fluxes, and hlfs as surface latent heat fluxes. Both fluxes are**  
 31 **defined downward as positive.**
